# Supplementary material for: Identification of immunotherapy biomarkers for improving the clinical outcome of homologous recombination deficiency patients with lung adenocarcinoma
Source: Aging (Albany NY). 2023 Aug 11;15(16):8090–112. doi: 10.18632/aging.204957 (PMC10496994; doi:10.18632/aging.204957)
Supplement: Supplementary Table 2 [file aging-15-204957-s003.xlsx]

## Sheet: Sheet1
Supplementary Table 2. Homologous recombination deficiency score in TCGA-LUAD patients.
id	AI1	LST1	LOH	HRD	cancer type
TCGA-99-AA5R-01A	0	0	0	0	LUAD
TCGA-75-6212-01A	0	0	0	0	LUAD
TCGA-44-6148-01A	0	0	0	0	LUAD
TCGA-49-AARR-01A	0	0	0	0	LUAD
TCGA-86-A4P8-01A	0	0	0	0	LUAD
TCGA-38-A44F-01A	0	0	0	0	LUAD
TCGA-55-8513-01A	0	0	0	0	LUAD
TCGA-86-8671-01A	1	0	0	1	LUAD
TCGA-55-6983-01A	1	1	0	2	LUAD
TCGA-38-7271-01A	1	1	0	2	LUAD
TCGA-NJ-A55A-01A	1	1	0	2	LUAD
TCGA-50-5055-01A	1	0	1	2	LUAD
TCGA-86-7714-01A	1	0	1	2	LUAD
TCGA-55-8619-01A	0	3	0	3	LUAD
TCGA-97-A4M2-01A	1	2	0	3	LUAD
TCGA-80-5607-01A	2	0	1	3	LUAD
TCGA-97-7941-01A	2	0	1	3	LUAD
TCGA-44-3398-01A	1	2	0	3	LUAD
TCGA-50-5942-01A	2	0	2	4	LUAD
TCGA-91-A4BD-01A	2	0	2	4	LUAD
TCGA-55-6543-01A	2	1	1	4	LUAD
TCGA-55-8206-01A	2	1	1	4	LUAD
TCGA-38-4627-01A	1	2	1	4	LUAD
TCGA-97-7552-01A	1	2	1	4	LUAD
TCGA-86-8076-01A	2	2	0	4	LUAD
TCGA-05-4418-01A	2	2	1	5	LUAD
TCGA-78-7158-01A	2	1	2	5	LUAD
TCGA-86-8674-01A	3	0	2	5	LUAD
TCGA-44-2655-01A	3	2	0	5	LUAD
TCGA-75-6203-01A	2	1	2	5	LUAD
TCGA-78-7537-01A	2	1	2	5	LUAD
TCGA-55-8097-01A	3	0	2	5	LUAD
TCGA-78-7153-01A	4	1	1	6	LUAD
TCGA-44-7661-01A	3	2	1	6	LUAD
TCGA-78-7148-01A	3	1	2	6	LUAD
TCGA-67-6216-01A	2	2	2	6	LUAD
TCGA-50-5044-01A	2	2	2	6	LUAD
TCGA-J2-8194-01A	3	2	2	7	LUAD
TCGA-75-7025-01A	3	3	1	7	LUAD
TCGA-50-5051-01A	3	3	1	7	LUAD
TCGA-35-3615-01A	4	2	1	7	LUAD
TCGA-55-6980-01A	4	1	2	7	LUAD
TCGA-50-8459-01A	1	3	3	7	LUAD
TCGA-69-8453-01A	5	2	0	7	LUAD
TCGA-97-8172-01A	5	0	2	7	LUAD
TCGA-78-7633-01A	6	1	1	8	LUAD
TCGA-50-8460-01A	4	3	1	8	LUAD
TCGA-69-8254-01A	2	3	3	8	LUAD
TCGA-55-8621-01A	4	1	3	8	LUAD
TCGA-44-6145-01A	3	2	3	8	LUAD
TCGA-38-4626-01A	4	4	0	8	LUAD
TCGA-44-2666-01A	1	4	3	8	LUAD
TCGA-05-4384-01A	4	2	2	8	LUAD
TCGA-J2-A4AG-01A	4	2	2	8	LUAD
TCGA-NJ-A4YP-01A	4	1	3	8	LUAD
TCGA-64-1680-01A	6	3	0	9	LUAD
TCGA-49-4486-01A	5	2	2	9	LUAD
TCGA-49-4506-01A	4	1	4	9	LUAD
TCGA-44-6147-01A	4	2	3	9	LUAD
TCGA-55-6978-01A	5	2	2	9	LUAD
TCGA-49-6742-01A	4	2	3	9	LUAD
TCGA-50-8457-01A	4	2	3	9	LUAD
TCGA-55-8087-01A	5	2	2	9	LUAD
TCGA-86-8281-01A	5	2	2	9	LUAD
TCGA-55-6986-01A	2	4	3	9	LUAD
TCGA-78-7162-01A	4	3	2	9	LUAD
TCGA-55-8090-01A	4	4	1	9	LUAD
TCGA-73-4677-01A	2	2	5	9	LUAD
TCGA-05-4249-01A	4	3	3	10	LUAD
TCGA-67-3774-01A	4	2	4	10	LUAD
TCGA-75-6205-01A	4	3	3	10	LUAD
TCGA-93-7347-01A	3	3	4	10	LUAD
TCGA-75-7027-01A	7	1	2	10	LUAD
TCGA-44-2661-01A	3	4	3	10	LUAD
TCGA-44-5645-01A	4	4	2	10	LUAD
TCGA-73-7498-01A	4	3	3	10	LUAD
TCGA-67-6215-01A	6	2	2	10	LUAD
TCGA-05-4425-01A	4	2	4	10	LUAD
TCGA-05-4403-01A	3	3	4	10	LUAD
TCGA-44-3396-01A	5	2	3	10	LUAD
TCGA-78-7160-01A	5	2	4	11	LUAD
TCGA-55-6979-01A	4	4	3	11	LUAD
TCGA-50-5045-01A	5	4	2	11	LUAD
TCGA-49-6745-01A	4	3	4	11	LUAD
TCGA-69-7761-01A	8	1	2	11	LUAD
TCGA-97-7546-01A	5	2	4	11	LUAD
TCGA-97-8175-01A	4	2	5	11	LUAD
TCGA-44-6146-01A	4	2	5	11	LUAD
TCGA-05-5715-01A	3	5	3	11	LUAD
TCGA-55-7728-01A	3	4	4	11	LUAD
TCGA-55-A492-01A	5	5	1	11	LUAD
TCGA-78-7163-01A	6	4	2	12	LUAD
TCGA-67-3773-01A	5	3	4	12	LUAD
TCGA-S2-AA1A-01A	3	4	5	12	LUAD
TCGA-55-7911-01A	7	3	2	12	LUAD
TCGA-50-6595-01A	5	3	4	12	LUAD
TCGA-44-6777-01A	7	1	4	12	LUAD
TCGA-67-3772-01A	7	2	3	12	LUAD
TCGA-99-7458-01A	3	3	6	12	LUAD
TCGA-78-7166-01A	5	4	3	12	LUAD
TCGA-55-6984-01A	7	2	3	12	LUAD
TCGA-NJ-A4YG-01A	7	2	3	12	LUAD
TCGA-44-7671-01A	5	3	4	12	LUAD
TCGA-97-8171-01A	4	7	1	12	LUAD
TCGA-05-5423-01A	7	4	1	12	LUAD
TCGA-78-7156-01A	6	2	4	12	LUAD
TCGA-55-7281-01A	6	1	5	12	LUAD
TCGA-44-7659-01A	6	3	3	12	LUAD
TCGA-91-8496-01A	4	8	1	13	LUAD
TCGA-55-8505-01A	2	6	5	13	LUAD
TCGA-99-8028-01A	5	7	1	13	LUAD
TCGA-97-8176-01A	7	2	4	13	LUAD
TCGA-73-4675-01A	6	5	2	13	LUAD
TCGA-50-5935-01A	8	3	2	13	LUAD
TCGA-05-4396-01A	5	2	6	13	LUAD
TCGA-05-4250-01A	4	6	4	14	LUAD
TCGA-75-6206-01A	7	1	6	14	LUAD
TCGA-55-8091-01A	5	4	5	14	LUAD
TCGA-44-A47B-01A	7	4	3	14	LUAD
TCGA-62-A46Y-01A	5	3	6	14	LUAD
TCGA-05-4426-01A	5	4	5	14	LUAD
TCGA-50-5068-01A	6	3	5	14	LUAD
TCGA-50-5066-01A	6	5	3	14	LUAD
TCGA-69-8253-01A	8	3	3	14	LUAD
TCGA-78-7149-01A	7	4	3	14	LUAD
TCGA-69-7765-01A	6	3	5	14	LUAD
TCGA-62-8397-01A	4	5	5	14	LUAD
TCGA-97-7547-01A	8	2	4	14	LUAD
TCGA-05-5429-01A	6	2	6	14	LUAD
TCGA-44-6776-01A	5	5	4	14	LUAD
TCGA-MP-A5C7-01A	7	2	5	14	LUAD
TCGA-44-6774-01A	4	6	4	14	LUAD
TCGA-55-7574-01A	5	2	8	15	LUAD
TCGA-05-5420-01A	5	4	6	15	LUAD
TCGA-86-8278-01A	5	3	7	15	LUAD
TCGA-49-4494-01A	3	6	6	15	LUAD
TCGA-62-A472-01A	8	3	4	15	LUAD
TCGA-55-8203-01A	7	4	4	15	LUAD
TCGA-55-7725-01A	7	4	4	15	LUAD
TCGA-93-7348-01A	6	4	5	15	LUAD
TCGA-64-5781-01A	6	3	6	15	LUAD
TCGA-83-5908-01A	5	5	6	16	LUAD
TCGA-50-5072-01A	7	5	4	16	LUAD
TCGA-55-7724-01A	6	5	5	16	LUAD
TCGA-64-5775-01A	9	3	4	16	LUAD
TCGA-MP-A4TE-01A	8	5	3	16	LUAD
TCGA-97-7553-01A	8	3	5	16	LUAD
TCGA-J2-A4AE-01A	5	7	4	16	LUAD
TCGA-86-8056-01A	4	5	7	16	LUAD
TCGA-55-8205-01A	9	1	6	16	LUAD
TCGA-MP-A4TH-01A	6	6	4	16	LUAD
TCGA-62-A46P-01A	6	4	6	16	LUAD
TCGA-55-6970-01A	7	4	5	16	LUAD
TCGA-97-7938-01A	7	3	6	16	LUAD
TCGA-44-3919-01A	6	5	5	16	LUAD
TCGA-44-A47A-01A	7	7	2	16	LUAD
TCGA-50-6673-01A	8	4	4	16	LUAD
TCGA-73-4659-01A	10	3	3	16	LUAD
TCGA-86-6562-01A	8	3	5	16	LUAD
TCGA-55-8512-01A	5	3	8	16	LUAD
TCGA-MP-A4SY-01A	3	9	4	16	LUAD
TCGA-NJ-A7XG-01A	6	10	1	17	LUAD
TCGA-44-2659-01A	8	2	7	17	LUAD
TCGA-75-5126-01A	7	6	4	17	LUAD
TCGA-55-6987-01A	5	7	5	17	LUAD
TCGA-73-4658-01A	8	5	4	17	LUAD
TCGA-95-A4VK-01A	11	3	3	17	LUAD
TCGA-75-5122-01A	7	4	6	17	LUAD
TCGA-05-4433-01A	7	2	8	17	LUAD
TCGA-73-4666-01A	8	3	6	17	LUAD
TCGA-78-7540-01A	6	5	6	17	LUAD
TCGA-97-A4M6-01A	7	5	6	18	LUAD
TCGA-91-6849-01A	5	6	7	18	LUAD
TCGA-NJ-A55R-01A	8	7	3	18	LUAD
TCGA-MP-A4T7-01A	7	6	5	18	LUAD
TCGA-75-5146-01A	5	5	8	18	LUAD
TCGA-78-7152-01A	5	6	7	18	LUAD
TCGA-55-6971-01A	7	8	3	18	LUAD
TCGA-50-5931-01A	9	2	7	18	LUAD
TCGA-55-8208-01A	6	8	4	18	LUAD
TCGA-62-8402-01A	9	6	4	19	LUAD
TCGA-86-8280-01A	12	4	3	19	LUAD
TCGA-55-6982-01A	6	4	9	19	LUAD
TCGA-91-6830-01A	6	5	8	19	LUAD
TCGA-86-8668-01A	5	10	4	19	LUAD
TCGA-49-AAR2-01A	6	3	10	19	LUAD
TCGA-05-4434-01A	5	9	5	19	LUAD
TCGA-95-8039-01A	7	6	6	19	LUAD
TCGA-97-8179-01A	9	2	8	19	LUAD
TCGA-55-8302-01A	8	5	6	19	LUAD
TCGA-86-A4JF-01A	11	4	4	19	LUAD
TCGA-55-A48X-01A	7	5	7	19	LUAD
TCGA-62-8398-01A	8	6	5	19	LUAD
TCGA-91-8497-01A	5	9	6	20	LUAD
TCGA-73-4676-01A	10	3	7	20	LUAD
TCGA-05-4422-01A	8	6	6	20	LUAD
TCGA-97-A4M1-01A	10	8	2	20	LUAD
TCGA-05-4430-01A	11	4	5	20	LUAD
TCGA-78-8655-01A	12	5	3	20	LUAD
TCGA-49-AARN-01A	6	4	10	20	LUAD
TCGA-62-A46R-01A	10	6	4	20	LUAD
TCGA-97-A4M7-01A	6	9	5	20	LUAD
TCGA-69-7764-01A	7	6	7	20	LUAD
TCGA-44-4112-01A	2	9	9	20	LUAD
TCGA-J2-8192-01A	9	6	5	20	LUAD
TCGA-97-7937-01A	11	5	5	21	LUAD
TCGA-78-7535-01A	11	2	8	21	LUAD
TCGA-05-5425-01A	14	2	5	21	LUAD
TCGA-49-4510-01A	8	6	7	21	LUAD
TCGA-49-AAR4-01A	7	4	10	21	LUAD
TCGA-L9-A50W-01A	6	5	10	21	LUAD
TCGA-55-6981-01A	10	7	4	21	LUAD
TCGA-97-A4M5-01A	5	7	9	21	LUAD
TCGA-64-1679-01A	9	7	5	21	LUAD
TCGA-49-AAR3-01A	4	7	10	21	LUAD
TCGA-05-4402-01A	10	4	7	21	LUAD
TCGA-55-A57B-01A	5	8	8	21	LUAD
TCGA-55-6972-01A	8	7	6	21	LUAD
TCGA-05-4405-01A	11	3	7	21	LUAD
TCGA-95-7944-01A	9	6	6	21	LUAD
TCGA-44-A47G-01A	5	14	2	21	LUAD
TCGA-55-A494-01A	8	11	3	22	LUAD
TCGA-69-7973-01A	9	11	2	22	LUAD
TCGA-44-8120-01A	9	3	10	22	LUAD
TCGA-05-4417-01A	8	10	4	22	LUAD
TCGA-NJ-A4YI-01A	11	5	6	22	LUAD
TCGA-99-8032-01A	8	8	6	22	LUAD
TCGA-91-6828-01A	12	7	3	22	LUAD
TCGA-55-8301-01A	9	6	7	22	LUAD
TCGA-44-2665-01A	9	7	6	22	LUAD
TCGA-62-8395-01A	7	7	8	22	LUAD
TCGA-86-8073-01A	7	4	11	22	LUAD
TCGA-55-8204-01A	9	3	10	22	LUAD
TCGA-50-6597-01A	8	6	8	22	LUAD
TCGA-J2-A4AD-01A	8	8	7	23	LUAD
TCGA-55-A48Y-01A	11	6	6	23	LUAD
TCGA-91-6835-01A	7	10	6	23	LUAD
TCGA-35-4123-01A	8	6	9	23	LUAD
TCGA-55-A493-01A	8	9	6	23	LUAD
TCGA-55-7903-01A	10	5	8	23	LUAD
TCGA-55-8207-01A	10	8	5	23	LUAD
TCGA-69-7763-01A	9	9	5	23	LUAD
TCGA-93-A4JN-01A	6	6	11	23	LUAD
TCGA-MP-A4TC-01A	10	1	12	23	LUAD
TCGA-55-7815-01A	9	10	4	23	LUAD
TCGA-55-7283-01A	10	10	3	23	LUAD
TCGA-95-7562-01A	9	9	5	23	LUAD
TCGA-50-5944-01A	13	8	2	23	LUAD
TCGA-55-7726-01A	14	3	7	24	LUAD
TCGA-78-8660-01A	9	8	7	24	LUAD
TCGA-55-7570-01A	12	3	9	24	LUAD
TCGA-49-6761-01A	9	7	8	24	LUAD
TCGA-86-8055-01A	12	6	6	24	LUAD
TCGA-50-5930-01A	9	2	13	24	LUAD
TCGA-95-A4VP-01A	9	9	6	24	LUAD
TCGA-05-4415-01A	13	4	7	24	LUAD
TCGA-55-6985-01A	8	9	7	24	LUAD
TCGA-55-6975-01A	8	6	10	24	LUAD
TCGA-55-7727-01A	8	9	7	24	LUAD
TCGA-91-6847-01A	12	6	6	24	LUAD
TCGA-55-8089-01A	10	7	7	24	LUAD
TCGA-55-1596-01A	12	6	6	24	LUAD
TCGA-44-5643-01A	13	4	7	24	LUAD
TCGA-55-8096-01A	10	7	7	24	LUAD
TCGA-53-7813-01A	9	10	5	24	LUAD
TCGA-95-7948-01A	8	10	7	25	LUAD
TCGA-49-4512-01A	12	9	4	25	LUAD
TCGA-50-5933-01A	12	7	6	25	LUAD
TCGA-55-8085-01A	11	8	6	25	LUAD
TCGA-69-7978-01A	13	7	5	25	LUAD
TCGA-86-A456-01A	7	8	10	25	LUAD
TCGA-86-A4D0-01A	7	10	8	25	LUAD
TCGA-50-5932-01A	10	7	8	25	LUAD
TCGA-78-7145-01A	12	9	5	26	LUAD
TCGA-49-6744-01A	9	8	9	26	LUAD
TCGA-64-1681-01A	14	8	4	26	LUAD
TCGA-50-5049-01A	11	7	8	26	LUAD
TCGA-53-7626-01A	12	6	8	26	LUAD
TCGA-62-A46S-01A	12	7	7	26	LUAD
TCGA-55-7914-01A	9	8	9	26	LUAD
TCGA-97-A4M0-01A	10	8	8	26	LUAD
TCGA-80-5608-01A	12	6	8	26	LUAD
TCGA-97-8552-01A	9	10	7	26	LUAD
TCGA-86-7701-01A	8	12	6	26	LUAD
TCGA-64-5778-01A	10	6	11	27	LUAD
TCGA-05-4390-01A	15	10	2	27	LUAD
TCGA-44-6775-01A	13	6	8	27	LUAD
TCGA-73-4670-01A	13	5	9	27	LUAD
TCGA-78-7159-01A	16	8	3	27	LUAD
TCGA-50-6590-01A	11	9	7	27	LUAD
TCGA-69-7974-01A	12	9	6	27	LUAD
TCGA-50-5936-01A	8	8	11	27	LUAD
TCGA-55-6712-01A	10	11	6	27	LUAD
TCGA-97-A4LX-01A	6	12	9	27	LUAD
TCGA-49-4490-01A	14	8	6	28	LUAD
TCGA-75-5125-01A	12	8	8	28	LUAD
TCGA-50-6593-01A	13	8	7	28	LUAD
TCGA-49-4501-01A	12	9	7	28	LUAD
TCGA-44-7672-01A	13	8	7	28	LUAD
TCGA-78-7143-01A	13	7	8	28	LUAD
TCGA-44-2657-01A	10	7	11	28	LUAD
TCGA-75-5147-01A	13	7	8	28	LUAD
TCGA-05-4244-01A	14	8	6	28	LUAD
TCGA-44-A4SU-01A	8	8	13	29	LUAD
TCGA-55-A48Z-01A	13	9	7	29	LUAD
TCGA-55-7573-01A	13	9	7	29	LUAD
TCGA-50-6591-01A	14	8	7	29	LUAD
TCGA-50-5941-01A	15	10	4	29	LUAD
TCGA-05-4424-01A	14	11	4	29	LUAD
TCGA-95-A4VN-01A	12	11	6	29	LUAD
TCGA-O1-A52J-01A	12	8	9	29	LUAD
TCGA-49-4487-01A	17	9	3	29	LUAD
TCGA-05-4432-01A	15	10	4	29	LUAD
TCGA-93-A4JO-01A	12	13	4	29	LUAD
TCGA-86-8075-01A	16	6	7	29	LUAD
TCGA-MP-A4TA-01A	7	10	13	30	LUAD
TCGA-64-1677-01A	10	14	6	30	LUAD
TCGA-62-8394-01A	15	12	3	30	LUAD
TCGA-50-7109-01A	14	13	3	30	LUAD
TCGA-49-4505-01A	13	12	5	30	LUAD
TCGA-38-6178-01A	15	10	5	30	LUAD
TCGA-62-A46V-01A	9	11	10	30	LUAD
TCGA-62-A470-01A	13	6	11	30	LUAD
TCGA-L9-A443-01A	13	9	8	30	LUAD
TCGA-49-6767-01A	11	9	10	30	LUAD
TCGA-55-8614-01A	13	7	10	30	LUAD
TCGA-44-A479-01A	11	11	9	31	LUAD
TCGA-64-5815-01A	12	9	10	31	LUAD
TCGA-97-8547-01A	9	11	11	31	LUAD
TCGA-55-8616-01A	16	6	9	31	LUAD
TCGA-97-A4M3-01A	11	11	9	31	LUAD
TCGA-99-8033-01A	10	13	8	31	LUAD
TCGA-49-4514-01A	11	13	7	31	LUAD
TCGA-78-7542-01A	16	6	9	31	LUAD
TCGA-67-3770-01A	14	7	11	32	LUAD
TCGA-05-4410-01A	18	7	7	32	LUAD
TCGA-L9-A5IP-01A	14	6	12	32	LUAD
TCGA-86-7954-01A	14	17	1	32	LUAD
TCGA-93-A4JP-01A	17	11	4	32	LUAD
TCGA-97-8177-01A	11	11	10	32	LUAD
TCGA-50-5946-01A	15	8	9	32	LUAD
TCGA-38-4629-01A	14	6	12	32	LUAD
TCGA-MP-A4T8-01A	16	9	7	32	LUAD
TCGA-55-7907-01A	15	10	7	32	LUAD
TCGA-97-8174-01A	10	13	9	32	LUAD
TCGA-86-A4P7-01A	11	15	6	32	LUAD
TCGA-49-6743-01A	12	10	11	33	LUAD
TCGA-44-2668-01A	10	13	10	33	LUAD
TCGA-05-4382-01A	16	10	7	33	LUAD
TCGA-55-1594-01A	16	7	10	33	LUAD
TCGA-62-A471-01A	16	4	13	33	LUAD
TCGA-86-8054-01A	16	10	7	33	LUAD
TCGA-44-6779-01A	12	10	11	33	LUAD
TCGA-50-6592-01A	12	12	9	33	LUAD
TCGA-44-2662-01A	16	5	13	34	LUAD
TCGA-05-4427-01A	18	11	5	34	LUAD
TCGA-55-6968-01A	13	11	10	34	LUAD
TCGA-55-6642-01A	13	14	7	34	LUAD
TCGA-64-1676-01A	13	8	13	34	LUAD
TCGA-67-6217-01A	15	14	6	35	LUAD
TCGA-86-7713-01A	14	13	8	35	LUAD
TCGA-50-5939-01A	12	10	13	35	LUAD
TCGA-35-4122-01A	12	14	9	35	LUAD
TCGA-49-AARE-01A	15	11	9	35	LUAD
TCGA-95-7947-01A	13	8	14	35	LUAD
TCGA-44-8119-01A	14	12	9	35	LUAD
TCGA-73-7499-01A	16	9	10	35	LUAD
TCGA-75-6207-01A	12	9	14	35	LUAD
TCGA-55-8620-01A	13	10	12	35	LUAD
TCGA-73-4668-01A	17	5	13	35	LUAD
TCGA-4B-A93V-01A	15	11	10	36	LUAD
TCGA-91-7771-01A	18	13	5	36	LUAD
TCGA-55-8508-01A	18	11	7	36	LUAD
TCGA-86-8672-01A	15	8	13	36	LUAD
TCGA-69-7760-01A	15	12	9	36	LUAD
TCGA-44-7667-01A	14	16	6	36	LUAD
TCGA-73-4662-01A	17	9	10	36	LUAD
TCGA-05-4395-01A	17	7	12	36	LUAD
TCGA-49-AAQV-01A	15	10	12	37	LUAD
TCGA-44-7669-01A	16	11	10	37	LUAD
TCGA-55-8094-01A	17	12	8	37	LUAD
TCGA-62-8399-01A	15	13	9	37	LUAD
TCGA-97-7554-01A	16	15	6	37	LUAD
TCGA-49-AARO-01A	16	11	10	37	LUAD
TCGA-55-8506-01A	19	9	9	37	LUAD
TCGA-78-7167-01A	15	14	8	37	LUAD
TCGA-L9-A8F4-01A	16	7	14	37	LUAD
TCGA-MP-A4T9-01A	13	13	11	37	LUAD
TCGA-44-8117-01A	18	11	9	38	LUAD
TCGA-55-8092-01A	18	13	7	38	LUAD
TCGA-49-AAR0-01A	10	9	19	38	LUAD
TCGA-44-6778-01A	20	10	8	38	LUAD
TCGA-55-A4DG-01A	17	10	11	38	LUAD
TCGA-86-6851-01A	16	11	11	38	LUAD
TCGA-49-AARQ-01A	19	13	7	39	LUAD
TCGA-95-8494-01A	17	12	10	39	LUAD
TCGA-86-8669-01A	18	15	6	39	LUAD
TCGA-75-6211-01A	16	17	6	39	LUAD
TCGA-86-7953-01A	15	9	15	39	LUAD
TCGA-MN-A4N5-01A	18	8	13	39	LUAD
TCGA-91-6831-01A	16	15	8	39	LUAD
TCGA-91-6840-01A	19	9	11	39	LUAD
TCGA-MP-A4SW-01A	14	14	11	39	LUAD
TCGA-44-7662-01A	16	10	13	39	LUAD
TCGA-55-A491-01A	16	12	11	39	LUAD
TCGA-86-8279-01A	21	12	7	40	LUAD
TCGA-38-4632-01A	19	15	6	40	LUAD
TCGA-38-4625-01A	19	12	9	40	LUAD
TCGA-64-1678-01A	18	13	9	40	LUAD
TCGA-93-8067-01A	19	14	7	40	LUAD
TCGA-55-8514-01A	17	13	10	40	LUAD
TCGA-78-7147-01A	17	12	11	40	LUAD
TCGA-38-4630-01A	13	11	16	40	LUAD
TCGA-NJ-A4YQ-01A	12	14	14	40	LUAD
TCGA-05-5428-01A	18	13	10	41	LUAD
TCGA-75-6214-01A	19	12	10	41	LUAD
TCGA-78-7220-01A	21	10	10	41	LUAD
TCGA-44-7660-01A	15	11	15	41	LUAD
TCGA-86-7955-01A	22	8	11	41	LUAD
TCGA-64-5774-01A	18	14	10	42	LUAD
TCGA-95-7567-01A	21	10	11	42	LUAD
TCGA-49-4507-01A	16	13	13	42	LUAD
TCGA-MP-A4SV-01A	21	16	5	42	LUAD
TCGA-71-6725-01A	21	14	7	42	LUAD
TCGA-55-8510-01A	19	11	12	42	LUAD
TCGA-38-4631-01A	14	17	11	42	LUAD
TCGA-78-7539-01A	16	20	6	42	LUAD
TCGA-55-7910-01A	16	17	9	42	LUAD
TCGA-91-6836-01A	16	15	11	42	LUAD
TCGA-86-7711-01A	13	16	14	43	LUAD
TCGA-55-1592-01A	16	19	8	43	LUAD
TCGA-05-4397-01A	17	15	11	43	LUAD
TCGA-MP-A4TI-01A	13	19	12	44	LUAD
TCGA-75-7031-01A	20	13	11	44	LUAD
TCGA-64-5779-01A	20	10	14	44	LUAD
TCGA-53-A4EZ-01A	18	9	17	44	LUAD
TCGA-55-A4DF-01A	20	14	10	44	LUAD
TCGA-44-A4SS-01A	13	23	8	44	LUAD
TCGA-99-8025-01A	23	12	9	44	LUAD
TCGA-86-8359-01A	17	17	10	44	LUAD
TCGA-55-5899-01A	19	10	16	45	LUAD
TCGA-73-A9RS-01A	17	17	11	45	LUAD
TCGA-35-5375-01A	16	20	9	45	LUAD
TCGA-05-4389-01A	17	16	12	45	LUAD
TCGA-55-8507-01A	17	19	10	46	LUAD
TCGA-05-4420-01A	19	18	9	46	LUAD
TCGA-L9-A444-01A	20	11	15	46	LUAD
TCGA-86-8074-01A	17	18	11	46	LUAD
TCGA-38-4628-01A	23	13	10	46	LUAD
TCGA-L4-A4E5-01A	16	11	20	47	LUAD
TCGA-50-6594-01A	20	12	15	47	LUAD
TCGA-95-7039-01A	21	23	3	47	LUAD
TCGA-05-4398-01A	18	16	13	47	LUAD
TCGA-L9-A7SV-01A	21	17	10	48	LUAD
TCGA-44-3917-01A	16	11	21	48	LUAD
TCGA-69-7980-01A	24	13	12	49	LUAD
TCGA-78-7154-01A	21	15	13	49	LUAD
TCGA-78-8640-01A	18	24	7	49	LUAD
TCGA-78-7146-01A	22	17	11	50	LUAD
TCGA-55-7995-01A	19	16	15	50	LUAD
TCGA-69-8255-01A	23	16	11	50	LUAD
TCGA-44-2656-01A	18	18	15	51	LUAD
TCGA-MN-A4N4-01A	24	19	8	51	LUAD
TCGA-55-7994-01A	25	14	12	51	LUAD
TCGA-67-3771-01A	22	20	9	51	LUAD
TCGA-L9-A743-01A	28	18	5	51	LUAD
TCGA-49-AAR9-01A	21	15	16	52	LUAD
TCGA-91-A4BC-01A	18	22	12	52	LUAD
TCGA-86-8585-01A	22	15	15	52	LUAD
TCGA-MP-A4TF-01A	22	19	11	52	LUAD
TCGA-44-7670-01A	24	15	14	53	LUAD
TCGA-55-7576-01A	22	21	10	53	LUAD
TCGA-86-8673-01A	20	20	13	53	LUAD
TCGA-55-A490-01A	22	19	13	54	LUAD
TCGA-80-5611-01A	19	19	16	54	LUAD
TCGA-95-7043-01A	25	14	15	54	LUAD
TCGA-78-7150-01A	24	15	16	55	LUAD
TCGA-55-8615-01A	28	19	9	56	LUAD
TCGA-69-7979-01A	27	18	11	56	LUAD
TCGA-44-3918-01A	18	22	18	58	LUAD
TCGA-91-6829-01A	23	20	16	59	LUAD
TCGA-49-4488-01A	30	13	16	59	LUAD
TCGA-78-7161-01A	21	31	8	60	LUAD
TCGA-93-A4JQ-01A	22	30	9	61	LUAD
TCGA-MP-A4TK-01A	23	17	21	61	LUAD
TCGA-62-A46O-01A	26	27	9	62	LUAD
TCGA-NJ-A4YF-01A	28	22	13	63	LUAD
TCGA-91-6848-01A	22	25	16	63	LUAD
TCGA-MN-A4N1-01A	28	21	15	64	LUAD
TCGA-55-8511-01A	27	22	15	64	LUAD
TCGA-91-8499-01A	24	29	12	65	LUAD
TCGA-53-7624-01A	24	25	17	66	LUAD
TCGA-78-7536-01A	21	35	10	66	LUAD
TCGA-78-8662-01A	27	24	17	68	LUAD
TCGA-86-8358-01A	23	27	20	70	LUAD
TCGA-44-5644-01A	25	28	20	73	LUAD
TCGA-78-7155-01A	29	27	22	78	LUAD
