# Supplementary material for: Identification of immunotherapy biomarkers for improving the clinical outcome of homologous recombination deficiency patients with lung adenocarcinoma
Source: Aging (Albany NY). 2023 Aug 11;15(16):8090–112. doi: 10.18632/aging.204957 (PMC10496994; doi:10.18632/aging.204957)
Supplement: Supplementary Table 3 [file aging-15-204957-s004.xlsx]

## Sheet: Sheet1
Supplementary Table 3. Neoantigens score of TCGA-LUAD patients
sample	indel_num	immunogenic_indel_num	neoantigen_num	cancer_type
TCGA-67-3771	44	29	74	LUAD
TCGA-67-3772	4	3	10	LUAD
TCGA-67-3774	3	0	0	LUAD
TCGA-L9-A8F4	22	15	54	LUAD
TCGA-44-5643	3	1	2	LUAD
TCGA-44-5644	34	22	58	LUAD
TCGA-44-5645	2	0	0	LUAD
TCGA-05-4249	12	5	15	LUAD
TCGA-67-3773	4	2	9	LUAD
TCGA-93-A4JP	2	0	0	LUAD
TCGA-93-A4JN	4	2	7	LUAD
TCGA-78-7155	64	20	52	LUAD
TCGA-53-7624	24	11	86	LUAD
TCGA-53-7626	10	6	17	LUAD
TCGA-L9-A7SV	30	16	46	LUAD
TCGA-50-5946	23	6	20	LUAD
TCGA-50-5942	2	1	14	LUAD
TCGA-50-5941	15	6	10	LUAD
TCGA-71-6725	1	1	1	LUAD
TCGA-NJ-A7XG	4	1	8	LUAD
TCGA-69-7979	35	10	23	LUAD
TCGA-69-7978	13	6	55	LUAD
TCGA-69-7973	11	8	24	LUAD
TCGA-69-7974	17	7	26	LUAD
TCGA-55-8089	18	6	13	LUAD
TCGA-55-8087	4	1	1	LUAD
TCGA-55-8085	5	1	3	LUAD
TCGA-NJ-A55O	4	2	3	LUAD
TCGA-NJ-A55A	3	1	5	LUAD
TCGA-NJ-A55R	11	3	3	LUAD
TCGA-L9-A443	11	6	14	LUAD
TCGA-L9-A444	19	8	26	LUAD
TCGA-91-7771	8	4	13	LUAD
TCGA-55-7815	2	1	3	LUAD
TCGA-44-3918	30	17	80	LUAD
TCGA-44-3919	4	1	4	LUAD
TCGA-4B-A93V	2	2	18	LUAD
TCGA-05-4433	1	0	0	LUAD
TCGA-05-4432	19	12	44	LUAD
TCGA-05-4430	8	4	10	LUAD
TCGA-05-4434	6	2	5	LUAD
TCGA-86-6851	28	8	15	LUAD
TCGA-95-7562	42	11	28	LUAD
TCGA-95-7567	50	17	60	LUAD
TCGA-95-8039	6	5	13	LUAD
TCGA-97-A4LX	1	1	12	LUAD
TCGA-55-8514	16	10	54	LUAD
TCGA-55-8511	23	10	40	LUAD
TCGA-55-8510	11	1	1	LUAD
TCGA-55-8512	2	1	2	LUAD
TCGA-78-7156	11	6	12	LUAD
TCGA-78-7153	5	2	4	LUAD
TCGA-05-4418	11	6	13	LUAD
TCGA-05-4410	24	10	20	LUAD
TCGA-05-4415	8	3	4	LUAD
TCGA-05-4417	13	9	34	LUAD
TCGA-86-7701	4	3	15	LUAD
TCGA-55-7994	61	40	101	LUAD
TCGA-55-7995	18	7	18	LUAD
TCGA-50-5055	1	1	5	LUAD
TCGA-50-5051	7	2	4	LUAD
TCGA-99-7458	28	15	71	LUAD
TCGA-91-6847	3	2	4	LUAD
TCGA-99-8032	17	11	40	LUAD
TCGA-99-8033	8	4	21	LUAD
TCGA-86-A456	8	4	22	LUAD
TCGA-71-8520	5	4	19	LUAD
TCGA-55-8616	13	4	11	LUAD
TCGA-55-8614	11	7	26	LUAD
TCGA-55-8615	4	2	3	LUAD
TCGA-64-5774	8	3	5	LUAD
TCGA-64-5775	25	11	41	LUAD
TCGA-64-5778	21	14	49	LUAD
TCGA-64-5779	15	5	11	LUAD
TCGA-75-7031	12	5	35	LUAD
TCGA-86-8281	10	8	28	LUAD
TCGA-86-8280	1	0	0	LUAD
TCGA-44-6774	6	3	7	LUAD
TCGA-91-6829	19	8	28	LUAD
TCGA-91-6828	14	6	14	LUAD
TCGA-44-6778	16	6	21	LUAD
TCGA-05-4389	7	7	30	LUAD
TCGA-L9-A743	1	1	8	LUAD
TCGA-05-4382	38	22	133	LUAD
TCGA-05-4384	4	2	4	LUAD
TCGA-78-7542	14	5	11	LUAD
TCGA-78-7540	1	1	4	LUAD
TCGA-L9-A5IP	11	7	29	LUAD
TCGA-49-AAR9	17	9	46	LUAD
TCGA-55-A57B	3	2	27	LUAD
TCGA-50-5072	10	3	17	LUAD
TCGA-95-7043	51	39	324	LUAD
TCGA-MP-A5C7	5	2	2	LUAD
TCGA-05-5715	7	2	5	LUAD
TCGA-78-7159	15	7	22	LUAD
TCGA-78-7158	10	6	9	LUAD
TCGA-78-7154	5	4	36	LUAD
TCGA-78-7150	13	9	34	LUAD
TCGA-78-7152	9	1	1	LUAD
TCGA-49-AARN	16	12	27	LUAD
TCGA-49-AAR4	16	8	73	LUAD
TCGA-80-5607	2	2	29	LUAD
TCGA-49-AAR3	3	2	9	LUAD
TCGA-49-AAR0	2	2	8	LUAD
TCGA-80-5608	5	4	9	LUAD
TCGA-49-AARE	33	15	141	LUAD
TCGA-49-AARQ	11	7	14	LUAD
TCGA-55-A4DF	7	3	4	LUAD
TCGA-55-A4DG	28	21	122	LUAD
TCGA-50-6591	6	1	1	LUAD
TCGA-50-6592	10	1	1	LUAD
TCGA-50-6594	26	18	75	LUAD
TCGA-50-6595	2	1	1	LUAD
TCGA-55-A493	7	4	14	LUAD
TCGA-55-A492	16	12	31	LUAD
TCGA-55-A491	9	4	20	LUAD
TCGA-55-A490	43	20	99	LUAD
TCGA-55-A494	7	3	13	LUAD
TCGA-67-4679	13	9	21	LUAD
TCGA-75-6205	1	1	1	LUAD
TCGA-75-6207	3	1	12	LUAD
TCGA-75-6206	1	1	1	LUAD
TCGA-75-6203	1	0	0	LUAD
TCGA-55-7283	4	2	6	LUAD
TCGA-55-A48X	8	4	27	LUAD
TCGA-55-A48Z	1	1	2	LUAD
TCGA-55-7914	7	6	23	LUAD
TCGA-55-7910	7	3	4	LUAD
TCGA-55-7911	8	5	5	LUAD
TCGA-55-7913	8	5	18	LUAD
TCGA-97-7547	6	4	16	LUAD
TCGA-97-7546	8	4	7	LUAD
TCGA-55-6980	3	1	3	LUAD
TCGA-55-6981	3	2	6	LUAD
TCGA-55-6982	7	6	20	LUAD
TCGA-55-6983	5	3	19	LUAD
TCGA-55-6984	3	2	8	LUAD
TCGA-55-6985	11	6	34	LUAD
TCGA-55-6986	2	2	4	LUAD
TCGA-55-6987	3	3	9	LUAD
TCGA-97-7937	23	6	11	LUAD
TCGA-97-7938	9	5	12	LUAD
TCGA-55-7570	17	11	65	LUAD
TCGA-MN-A4N1	14	9	61	LUAD
TCGA-MP-A4TF	14	3	7	LUAD
TCGA-MP-A4TE	5	2	5	LUAD
TCGA-MP-A4TD	5	2	2	LUAD
TCGA-MP-A4TC	10	6	9	LUAD
TCGA-MP-A4TA	10	3	10	LUAD
TCGA-MP-A4TK	10	5	6	LUAD
TCGA-MP-A4TJ	3	3	14	LUAD
TCGA-MP-A4TH	5	0	0	LUAD
TCGA-J2-8194	3	1	1	LUAD
TCGA-J2-8192	5	3	7	LUAD
TCGA-78-7633	6	3	28	LUAD
TCGA-MP-A4T7	2	0	0	LUAD
TCGA-MP-A4T4	11	6	39	LUAD
TCGA-MP-A4T9	1	1	2	LUAD
TCGA-MP-A4T8	7	2	6	LUAD
TCGA-91-6849	5	0	0	LUAD
TCGA-91-6848	15	5	12	LUAD
TCGA-J2-A4AE	2	0	0	LUAD
TCGA-J2-A4AD	12	7	18	LUAD
TCGA-J2-A4AG	6	3	16	LUAD
TCGA-44-A47B	3	1	2	LUAD
TCGA-44-A47A	8	2	6	LUAD
TCGA-44-A47G	2	0	0	LUAD
TCGA-49-4486	4	3	19	LUAD
TCGA-49-4487	15	7	45	LUAD
TCGA-44-A479	12	11	43	LUAD
TCGA-49-4488	9	5	12	LUAD
TCGA-50-6590	24	20	129	LUAD
TCGA-50-6593	7	2	10	LUAD
TCGA-64-1680	3	1	3	LUAD
TCGA-64-1681	4	1	2	LUAD
TCGA-44-6775	3	2	11	LUAD
TCGA-44-6777	16	7	18	LUAD
TCGA-44-6776	10	7	25	LUAD
TCGA-44-6779	5	3	6	LUAD
TCGA-78-8640	20	11	19	LUAD
TCGA-64-5815	4	2	5	LUAD
TCGA-44-8120	29	20	121	LUAD
TCGA-53-A4EZ	12	6	13	LUAD
TCGA-97-8547	4	1	1	LUAD
TCGA-05-5425	19	4	4	LUAD
TCGA-75-5147	3	2	3	LUAD
TCGA-75-5146	9	6	11	LUAD
TCGA-05-5429	3	1	4	LUAD
TCGA-05-5428	10	4	11	LUAD
TCGA-55-6968	11	7	46	LUAD
TCGA-55-6969	17	7	57	LUAD
TCGA-78-8662	22	8	25	LUAD
TCGA-78-8660	9	5	10	LUAD
TCGA-S2-AA1A	2	1	12	LUAD
TCGA-86-8669	9	5	11	LUAD
TCGA-86-8668	2	1	1	LUAD
TCGA-44-2662	6	1	5	LUAD
TCGA-44-3398	7	2	5	LUAD
TCGA-44-3396	8	5	16	LUAD
TCGA-55-7227	6	3	4	LUAD
TCGA-73-4675	8	5	12	LUAD
TCGA-73-4676	6	3	25	LUAD
TCGA-73-4677	4	1	3	LUAD
TCGA-73-4670	20	10	41	LUAD
TCGA-49-4507	5	3	5	LUAD
TCGA-49-4506	6	1	6	LUAD
TCGA-49-4505	8	2	7	LUAD
TCGA-49-4501	3	1	6	LUAD
TCGA-50-5939	3	2	4	LUAD
TCGA-50-5936	3	2	2	LUAD
TCGA-50-5935	1	1	5	LUAD
TCGA-50-5933	18	10	22	LUAD
TCGA-50-5932	5	3	10	LUAD
TCGA-50-5931	12	5	13	LUAD
TCGA-50-5930	29	7	48	LUAD
TCGA-38-4628	7	2	78	LUAD
TCGA-38-4626	10	4	18	LUAD
TCGA-50-8459	5	2	2	LUAD
TCGA-50-8457	4	1	1	LUAD
TCGA-91-8499	15	8	13	LUAD
TCGA-91-8496	4	3	8	LUAD
TCGA-91-8497	3	1	2	LUAD
TCGA-95-8494	1	1	3	LUAD
TCGA-73-4658	5	3	14	LUAD
TCGA-73-4659	11	5	12	LUAD
TCGA-55-7281	21	15	42	LUAD
TCGA-97-8171	2	0	0	LUAD
TCGA-97-8172	17	6	18	LUAD
TCGA-97-8175	2	2	12	LUAD
TCGA-97-8174	6	4	12	LUAD
TCGA-97-8177	2	2	8	LUAD
TCGA-97-8176	5	2	3	LUAD
TCGA-97-8179	9	4	12	LUAD
TCGA-86-7954	3	1	1	LUAD
TCGA-86-7955	10	3	11	LUAD
TCGA-62-A472	6	3	9	LUAD
TCGA-62-A471	2	1	3	LUAD
TCGA-62-A470	7	5	19	LUAD
TCGA-38-6178	3	1	3	LUAD
TCGA-44-7672	7	3	15	LUAD
TCGA-44-7671	12	9	46	LUAD
TCGA-44-7670	42	20	66	LUAD
TCGA-MN-A4N5	17	10	35	LUAD
TCGA-MN-A4N4	42	24	85	LUAD
TCGA-55-8208	5	3	8	LUAD
TCGA-75-5122	6	4	35	LUAD
TCGA-75-5125	12	6	12	LUAD
TCGA-75-5126	16	11	60	LUAD
TCGA-69-A59K	13	6	27	LUAD
TCGA-86-8359	10	4	37	LUAD
TCGA-86-8358	29	20	71	LUAD
TCGA-55-8301	21	9	17	LUAD
TCGA-55-8302	25	8	13	LUAD
TCGA-44-7659	9	4	10	LUAD
TCGA-05-4250	15	4	20	LUAD
TCGA-62-8402	1	0	0	LUAD
TCGA-55-6970	4	2	12	LUAD
TCGA-83-5908	7	4	11	LUAD
TCGA-55-8094	17	11	33	LUAD
TCGA-55-8096	3	0	0	LUAD
TCGA-55-8097	6	3	7	LUAD
TCGA-55-8090	4	2	9	LUAD
TCGA-55-8092	15	9	23	LUAD
TCGA-62-8395	6	5	16	LUAD
TCGA-62-8394	3	2	3	LUAD
TCGA-62-8397	4	1	2	LUAD
TCGA-62-8399	12	4	7	LUAD
TCGA-62-8398	2	2	5	LUAD
TCGA-64-5781	44	15	55	LUAD
TCGA-78-7537	12	7	58	LUAD
TCGA-78-7536	14	8	39	LUAD
TCGA-78-7535	4	3	17	LUAD
TCGA-78-7539	9	5	11	LUAD
TCGA-05-4420	7	3	6	LUAD
TCGA-05-4422	4	1	9	LUAD
TCGA-05-4424	24	7	24	LUAD
TCGA-05-4426	1	1	3	LUAD
TCGA-05-4427	29	20	128	LUAD
TCGA-55-5899	9	6	13	LUAD
TCGA-69-7980	32	15	72	LUAD
TCGA-55-8506	146	80	535	LUAD
TCGA-55-8508	10	8	101	LUAD
TCGA-55-8507	33	13	40	LUAD
TCGA-99-AA5R	1	0	0	LUAD
TCGA-86-A4JF	138	68	301	LUAD
TCGA-86-8054	8	4	12	LUAD
TCGA-86-8056	6	4	43	LUAD
TCGA-95-7039	55	33	139	LUAD
TCGA-44-2659	21	6	20	LUAD
TCGA-05-4405	12	10	34	LUAD
TCGA-05-4402	6	2	29	LUAD
TCGA-05-4403	7	4	4	LUAD
TCGA-86-7711	12	7	62	LUAD
TCGA-86-7714	6	4	4	LUAD
TCGA-50-7109	9	5	21	LUAD
TCGA-64-1679	17	8	21	LUAD
TCGA-64-1677	6	4	19	LUAD
TCGA-64-1676	13	5	10	LUAD
TCGA-97-A4M5	2	1	1	LUAD
TCGA-97-A4M7	15	10	52	LUAD
TCGA-97-A4M6	4	2	2	LUAD
TCGA-97-A4M0	12	8	22	LUAD
TCGA-97-A4M3	6	2	5	LUAD
TCGA-78-7166	8	3	10	LUAD
TCGA-78-7167	4	4	38	LUAD
TCGA-78-7160	1	1	2	LUAD
TCGA-78-7161	5	1	5	LUAD
TCGA-78-7162	3	1	4	LUAD
TCGA-78-7163	2	0	0	LUAD
TCGA-55-8621	1	1	13	LUAD
TCGA-55-8620	21	13	47	LUAD
TCGA-75-7027	9	7	14	LUAD
TCGA-86-8073	35	19	74	LUAD
TCGA-86-8074	4	1	1	LUAD
TCGA-35-5375	15	6	11	LUAD
TCGA-05-4398	28	20	79	LUAD
TCGA-05-4396	7	4	58	LUAD
TCGA-05-4397	32	14	56	LUAD
TCGA-05-4395	4	1	1	LUAD
TCGA-05-4390	28	16	51	LUAD
TCGA-50-5045	12	7	21	LUAD
TCGA-50-5044	2	1	2	LUAD
TCGA-67-6217	7	2	6	LUAD
TCGA-50-5049	29	20	102	LUAD
TCGA-73-A9RS	34	20	67	LUAD
TCGA-99-8025	12	5	53	LUAD
TCGA-99-8028	4	1	2	LUAD
TCGA-78-7146	11	5	9	LUAD
TCGA-78-7147	15	10	25	LUAD
TCGA-78-7145	6	3	10	LUAD
TCGA-78-7148	10	6	30	LUAD
TCGA-78-7149	3	2	8	LUAD
TCGA-86-8279	12	4	18	LUAD
TCGA-38-4625	13	6	16	LUAD
TCGA-L4-A4E5	7	3	5	LUAD
TCGA-50-5068	4	1	4	LUAD
TCGA-50-5066	8	5	19	LUAD
TCGA-50-6673	8	5	9	LUAD
TCGA-35-4122	7	1	1	LUAD
TCGA-35-4123	5	3	12	LUAD
TCGA-55-A48Y	5	3	7	LUAD
TCGA-73-7499	1	1	7	LUAD
TCGA-73-7498	8	4	14	LUAD
TCGA-80-5611	12	7	13	LUAD
TCGA-O1-A52J	7	2	15	LUAD
TCGA-75-6212	3	1	2	LUAD
TCGA-75-6211	9	3	16	LUAD
TCGA-75-6214	18	9	21	LUAD
TCGA-86-7713	8	5	19	LUAD
TCGA-86-8585	24	17	72	LUAD
TCGA-55-8205	24	20	219	LUAD
TCGA-55-8204	4	1	1	LUAD
TCGA-55-8207	17	8	22	LUAD
TCGA-55-8206	3	1	1	LUAD
TCGA-55-8203	10	6	20	LUAD
TCGA-53-7813	10	4	42	LUAD
TCGA-97-7554	18	7	16	LUAD
TCGA-97-7552	3	2	2	LUAD
TCGA-97-7553	7	4	11	LUAD
TCGA-55-6712	8	2	16	LUAD
TCGA-67-6215	1	1	2	LUAD
TCGA-67-6216	5	3	6	LUAD
TCGA-97-7941	4	2	5	LUAD
TCGA-NJ-A4YI	19	10	34	LUAD
TCGA-NJ-A4YG	3	0	0	LUAD
TCGA-NJ-A4YF	22	10	137	LUAD
TCGA-NJ-A4YQ	38	24	97	LUAD
TCGA-NJ-A4YP	8	6	17	LUAD
TCGA-55-7907	30	17	46	LUAD
TCGA-55-7903	11	7	24	LUAD
TCGA-69-8253	3	1	8	LUAD
TCGA-69-8255	16	10	86	LUAD
TCGA-69-8254	4	1	1	LUAD
TCGA-95-7947	15	6	20	LUAD
TCGA-95-7944	4	0	0	LUAD
TCGA-75-7025	3	0	0	LUAD
TCGA-44-A4SU	3	1	3	LUAD
TCGA-44-A4SS	14	8	57	LUAD
TCGA-69-7760	6	3	6	LUAD
TCGA-69-7761	3	1	2	LUAD
TCGA-69-7763	4	1	1	LUAD
TCGA-69-7764	2	1	2	LUAD
TCGA-69-7765	16	7	18	LUAD
TCGA-91-6830	6	2	10	LUAD
TCGA-91-6831	14	10	42	LUAD
TCGA-91-6835	1	0	0	LUAD
TCGA-91-6836	14	10	14	LUAD
TCGA-78-7220	27	10	21	LUAD
TCGA-44-4112	22	10	66	LUAD
TCGA-86-8075	5	2	8	LUAD
TCGA-49-4490	1	0	0	LUAD
TCGA-49-4494	4	1	2	LUAD
TCGA-44-8119	23	17	51	LUAD
TCGA-44-8117	27	20	93	LUAD
TCGA-55-6543	2	1	4	LUAD
TCGA-55-1596	5	2	2	LUAD
TCGA-55-1594	6	3	6	LUAD
TCGA-55-1592	12	6	8	LUAD
TCGA-93-8067	7	2	9	LUAD
TCGA-55-7573	5	2	10	LUAD
TCGA-78-8655	6	3	30	LUAD
TCGA-55-7576	10	3	6	LUAD
TCGA-55-7574	4	2	17	LUAD
TCGA-44-2668	11	4	11	LUAD
TCGA-86-8672	14	5	11	LUAD
TCGA-86-8673	23	13	61	LUAD
TCGA-86-8674	11	5	12	LUAD
TCGA-91-A4BD	1	0	0	LUAD
TCGA-91-A4BC	11	5	25	LUAD
TCGA-95-A4VP	4	3	7	LUAD
TCGA-95-A4VN	11	5	19	LUAD
TCGA-95-A4VK	6	1	3	LUAD
TCGA-MP-A4SV	9	6	17	LUAD
TCGA-MP-A4SW	2	1	24	LUAD
TCGA-MP-A4SY	2	0	0	LUAD
TCGA-49-6745	3	1	5	LUAD
TCGA-49-6744	5	1	1	LUAD
TCGA-49-6743	27	11	37	LUAD
TCGA-49-6742	6	5	12	LUAD
TCGA-44-6146	2	1	2	LUAD
TCGA-44-6144	3	2	7	LUAD
TCGA-44-6145	8	6	17	LUAD
TCGA-97-8552	2	1	2	LUAD
TCGA-49-AAR2	15	14	108	LUAD
TCGA-49-4514	11	4	22	LUAD
TCGA-49-4510	2	1	2	LUAD
TCGA-49-4512	3	2	8	LUAD
TCGA-55-6979	4	3	10	LUAD
TCGA-55-6978	2	1	4	LUAD
TCGA-55-6975	6	2	4	LUAD
TCGA-55-6971	3	1	1	LUAD
TCGA-55-6972	9	4	13	LUAD
TCGA-44-2656	26	13	40	LUAD
TCGA-44-2657	8	1	1	LUAD
TCGA-44-2655	7	2	7	LUAD
TCGA-55-7727	4	3	9	LUAD
TCGA-55-7726	3	2	3	LUAD
TCGA-55-7725	10	6	19	LUAD
TCGA-55-7724	4	1	1	LUAD
TCGA-55-7728	2	1	1	LUAD
TCGA-49-6767	12	1	1	LUAD
TCGA-49-6761	4	3	14	LUAD
TCGA-73-4668	16	10	23	LUAD
TCGA-73-4666	11	6	38	LUAD
TCGA-73-4662	10	3	4	LUAD
TCGA-62-A46P	8	5	14	LUAD
TCGA-62-A46R	10	7	14	LUAD
TCGA-62-A46S	3	1	1	LUAD
TCGA-62-A46U	2	0	0	LUAD
TCGA-62-A46V	3	2	9	LUAD
TCGA-62-A46Y	6	4	36	LUAD
TCGA-62-A46O	32	20	104	LUAD
TCGA-91-6840	5	1	1	LUAD
TCGA-38-4631	25	14	94	LUAD
TCGA-38-4632	21	15	38	LUAD
TCGA-44-7669	17	10	37	LUAD
TCGA-44-7660	13	4	12	LUAD
TCGA-44-7661	9	4	26	LUAD
TCGA-44-7662	13	5	30	LUAD
TCGA-44-7667	15	8	42	LUAD
TCGA-50-8460	3	2	4	LUAD
TCGA-93-7347	5	1	6	LUAD
TCGA-49-AARO	11	8	32	LUAD
TCGA-55-6642	5	1	8	LUAD
TCGA-95-7948	3	1	2	LUAD
TCGA-86-A4P7	4	2	4	LUAD
